# Supplementary material
Source: PubMed Central journal article supplement (PMC4044861)
Supplement: supp_pp.113.226522_226522Supplement.pdf [file supp_pp.113.226522_226522Supplement.pdf]

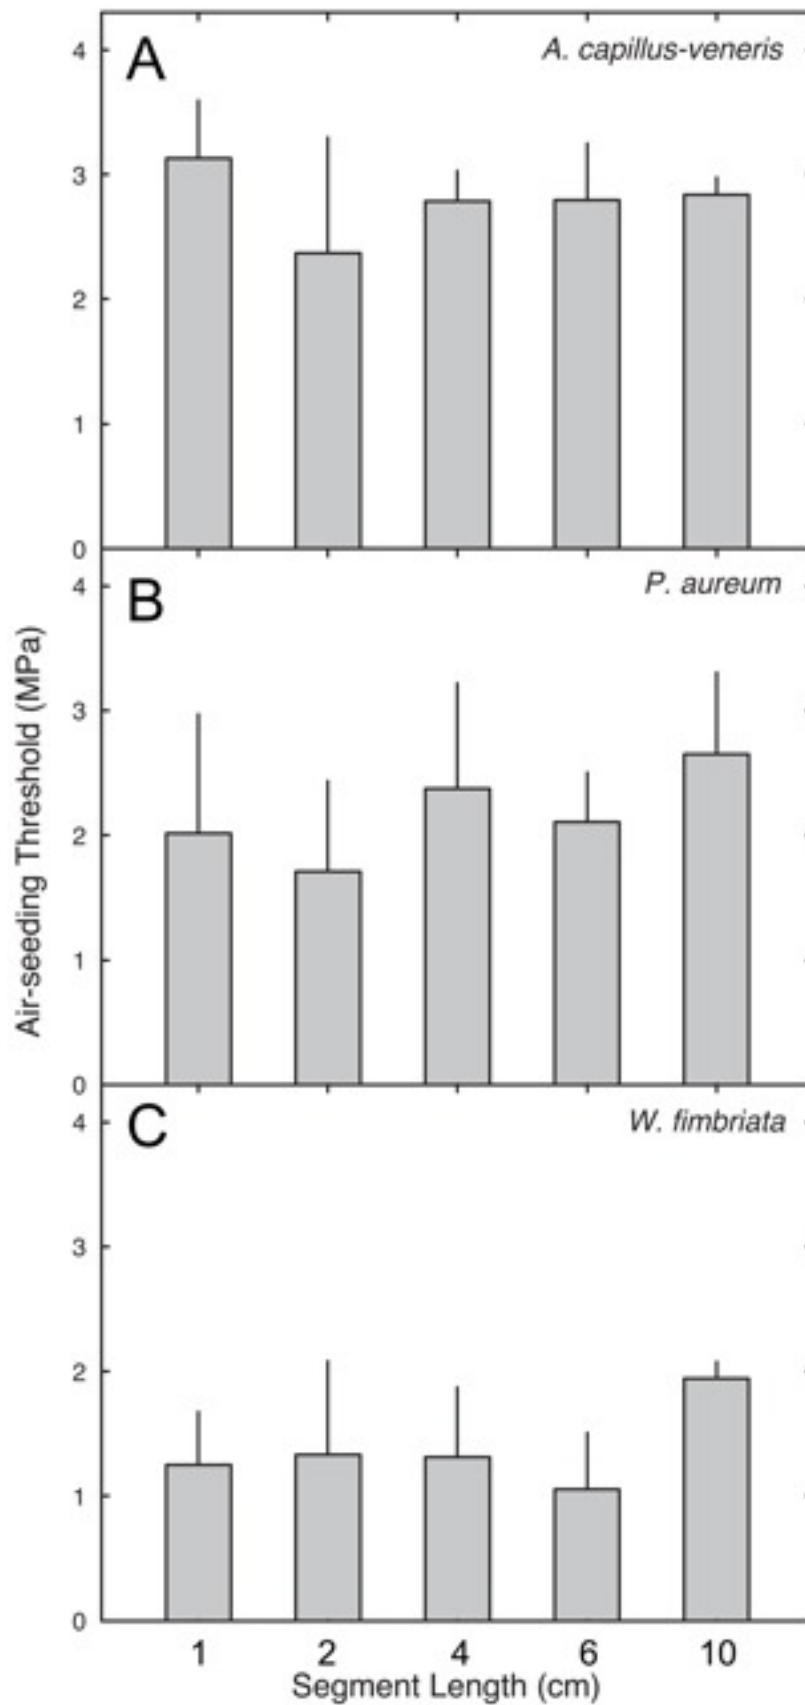

Figure S1: Mean air-seeding threshold values for three fern species in stipe segments of different lengths. Bars = SD,  $P > 0.11$ .

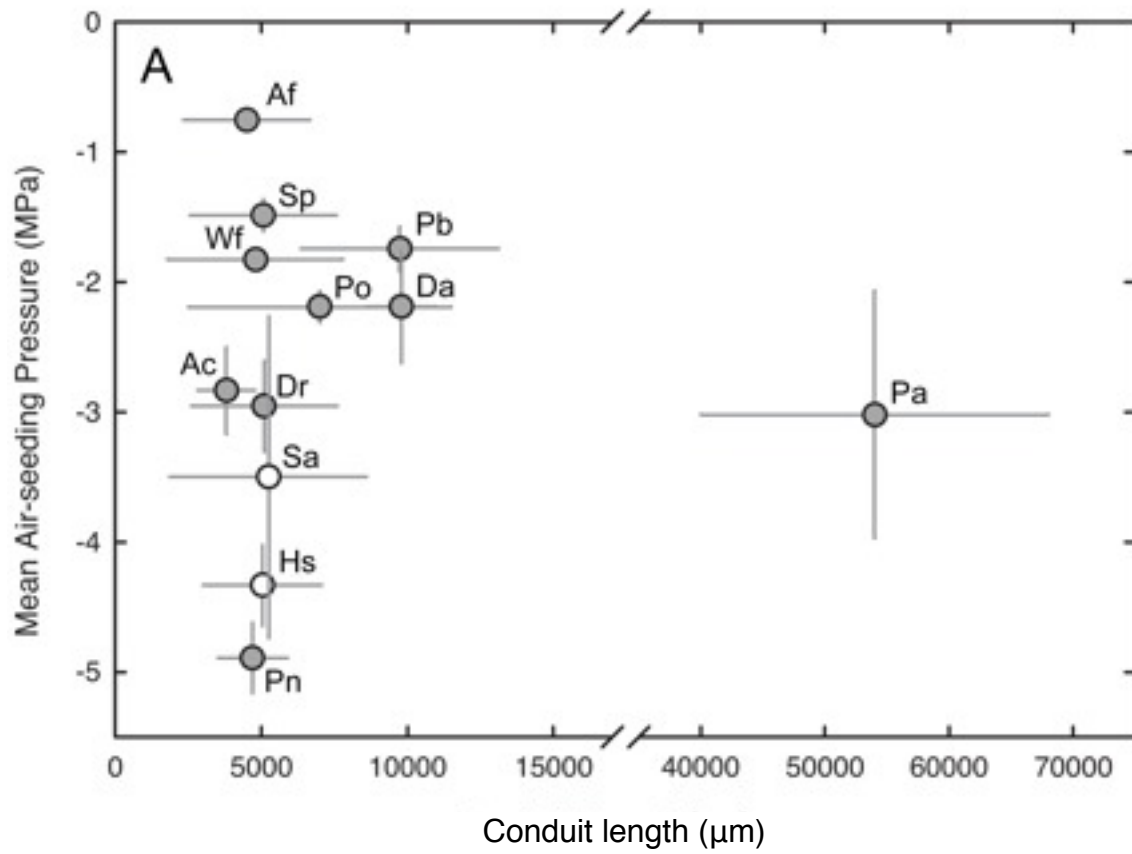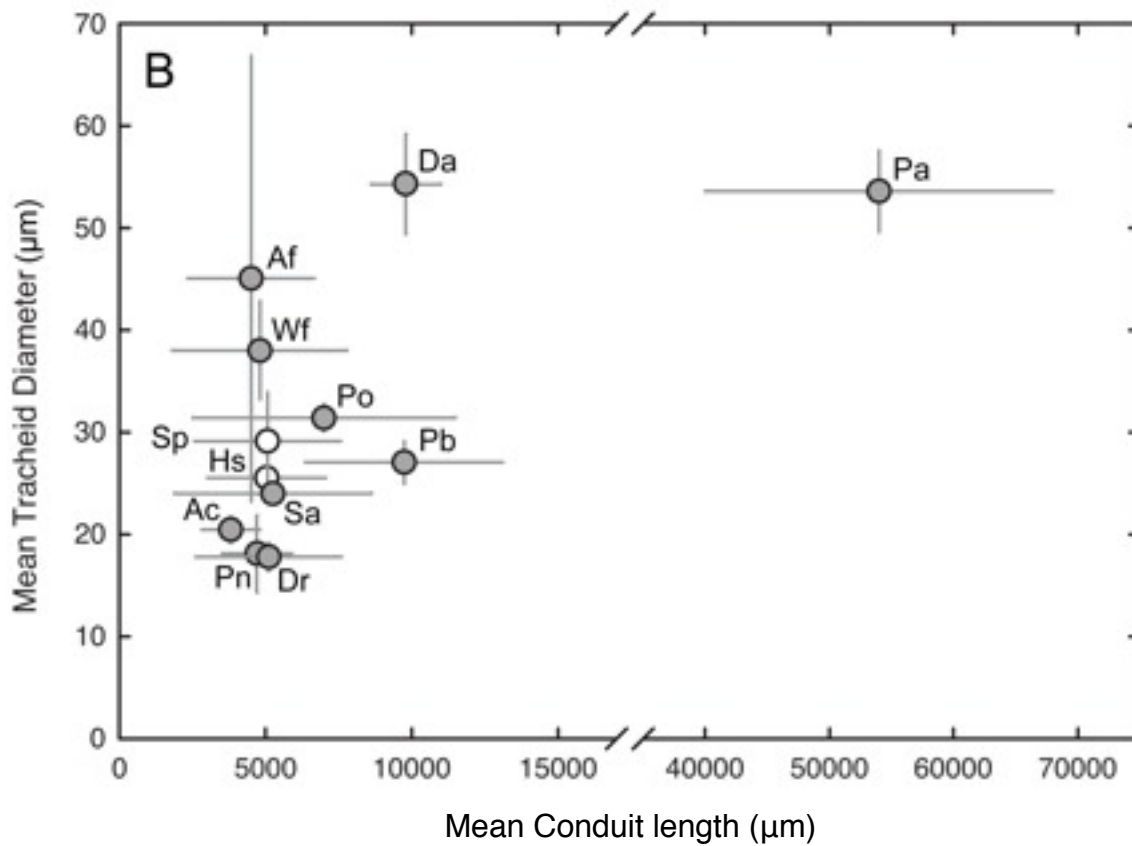

Figure S2: Mean air-seeding pressure (A) and conduit diameter (B) compared to mean conduit length in 12 species. Bars = SD.
